# Supplementary material for: Analytical Model for Thermoregulation of the Human Body in Contact with a Phase Change Material (PCM) Cooling Vest
Source: MDPI journal article supplement (doi:10.3390/thermo2030017), 2022-08-29
Supplement: s1 [file s1]

Archive with 1 entries (1 files):
- thermo-1853058-supplementary.pdf
