# Supplementary material for: Analytical Model for Thermoregulation of the Human Body in Contact with a Phase Change Material (PCM) Cooling Vest
Source: MDPI journal article supplement (doi:10.3390/thermo2030017), 2022-08-29
Supplement: s1 [file s1 › thermo-1853058-supplementary.pdf]

## Supplemental Information

### S1: Simplification of body core temperature, Eq.14a:

The solutions presented in this paper all contain transient terms which can be simplified if  $\alpha_i t < 1$  by expanding the exponential function in a power series

$$1 - e^{-\alpha t} \approx 1 - \left\{ 1 - \alpha t + \frac{1}{2}(\alpha t)^2 - \dots \right\} = \alpha t + O(\alpha^2 t^2)$$

In the example considered in this paper we find  $\alpha_1 = 8.2 \cdot 10^{-6} \text{ s}^{-1}$  and  $\alpha_2 = 5.1 \cdot 10^{-4} \text{ s}^{-1}$  which corresponds to times of 34 and 0.5 hour, respectively. Assuming  $Q_3=0$  and expanding only the first transient then yields

$$T_1^{Q+r} \cong \beta Q'_1 t + \frac{(1-\beta)Q'_1}{\alpha_2} [1 - e^{-\alpha_2 t}] \quad \text{Eq. S1}$$

The effect of the second transient however is small since here  $\beta = 0.994$ . By expanding both transient terms we can see that the  $Q_3$  terms cancel, resulting in

$$T_1^{Q+r} \cong Q'_1 t \quad \text{Eq. S2}$$

### S2: Continuation after a change in boundary conditions

After an event at  $t_k$  (like a change in boundary condition or the end of melting)

$$T_1(t > t_k) = T_1(t_k) - A_1[1 - e^{-\alpha_1(t-t_k)}] - A_2[1 - e^{-\alpha_1(t-t_k)}] \quad \text{Eq. S3}$$

and similarly for  $T_3$ . Note that this also requires an update of the temperatures in the  $A_i$  and  $B_i$  terms.

### S3: Human body with PCM and no radiation:

Fully enclosed protective clothing such as chemical, biological or firefighter garment systems are an example of a situation in which the internally produced metabolic heat cannot escape and in such situations often PCM cooling elements are enclosed within the garment to temporary improve thermal comfort. In absence of radiation the solutions for  $T_1$  and  $T_3$  as given in Eqs.12–15 largely simplify and become

$$\begin{aligned} T_1^{no \text{ rad}} &= T_1^0 - (1-\beta)(T_1^0 - T_3^0)[1 - e^{-\alpha_0 t}] \\ T_3^{no \text{ rad}} &= T_3^0 + \beta(T_1^0 - T_3^0)[1 - e^{-\alpha_0 t}] \\ T_1^{Q, no \text{ rad}} &= [\beta Q'_1 + (1-\beta)Q'_3]t + \frac{1-\beta}{\alpha_0} (Q'_1 - Q'_3)[1 - e^{-\alpha_0 t}] \\ T_3^{Q, no \text{ rad}} &= [\beta Q'_1 + (1-\beta)Q'_3]t - \frac{\beta}{\alpha_0} (Q'_1 - Q'_3)[1 - e^{-\alpha_0 t}] \end{aligned}$$

where  $\beta$  now reduces to  $h_3/(h_1+h_3)$  and  $\alpha_0 = h_1+h_3$  as before.

The heat flux at interface 1 is proportional to the  $T_1$ - $T_3$  temperature difference. Using the equations above this then becomes

$$T_1 - T_3 = (T_1^0 - T_3^0)e^{-\alpha_0 t} + \frac{Q'_1 - Q'_3}{\alpha_0} [1 - e^{-\alpha_0 t}] \quad \text{Eq. S4}$$

#### S4: Hotplate without radiation:

The most direct experimental evidence about the possible cooling power and duration of a PCM cooling element can be obtained by blocking the cooling capacity which is lost by radiation during a hotplate experiment. Experimentally this is done by carefully insulating the PCM outer surface. The transient and melting stage solutions for the cooling power then become

$$P_{hp} = \frac{A}{R_2^{eff}} (T_1^{hp} - T_3^0) e^{-h_3 t} \quad t < t_1, \quad \text{phase 1} \quad \text{Eq. S5}$$

$$P_{hp} = \frac{A}{R_2^{eff}} (T_1^{hp} - T_3^m) \quad t_1 < t < t_2, \quad \text{PCM melting} \quad \text{Eq. S6}$$

$$P_{hp} = \frac{A}{R_2^{eff}} (T_1^{hp} - T_3^m) e^{-h_3 (t - t_2)} \quad t > t_2, \quad \text{phase 3} \quad \text{Eq. S7}$$

Thus from such an experiment the contact resistance  $R_2^{eff}$  can be determined from the melting plateau and the parameter  $h_3$  is obtained from the phase 3 transient. By comparing this with a hotplate experiment with radiation, we can also obtain parameter  $h_4$  (see Eq.20).
